# Supplementary material for: High-Density Real-Time PCR-Based in Vivo Toxicogenomic Screen to Predict Organ-Specific Toxicity
Source: MDPI journal article supplement (doi:10.3390/ijms12096116), 2011-09-19
Supplement: s1 [file s1]

| NAME              | Doxo B   | Doxo L   | Doxo H   | Doxo K   | Sulfa B  | Sulfa L  | Sulfa H  | Sulfa K  |
|-------------------|----------|----------|----------|----------|----------|----------|----------|----------|
| <i>PSMB8</i>      | #DIV/0!  | 0.394944 | 0.056412 | 0.181726 | 0.297095 | 0.240653 | 0.125602 | #DIV/0!  |
| <i>Clu</i>        | 0.793136 | 0.264324 | 0.664902 | 0.212571 | 0.774687 | 0.290549 | 0.46847  | 0.481647 |
| <i>Reg3a</i>      | #DIV/0!  |
| <i>PEPCK</i>      | 0.623068 | 0.324206 | 0.165463 | 0.232414 | #DIV/0!  | 0.391947 | #DIV/0!  | 0.350465 |
| <i>PPIA, pep</i>  | 0.613314 | 0.469628 | 0.614187 | 0.357245 | 0.601617 | 0.169499 | 0.315283 | 0.702852 |
| <i>PCNA</i>       | 0.583648 | 0.499722 | 0.667859 | 0.206852 | 0.544555 | 0.469976 | 0.25195  | 0.352062 |
| <i>PRDX1</i>      | 0.682315 | 0.275811 | 0.429499 | 0.327521 | 0.681865 | 0.177189 | 0.327185 | 0.209563 |
| <i>NOX3</i>       | #DIV/0!  |
| <i>Ptpmt1</i>     | 0.645924 | 0.705713 | 0.587348 | 0.476082 | 0.660503 | 0.225492 | 0.193019 | 0.559362 |
| <i>Klk1b3</i>     | #DIV/0!  | #DIV/0!  | #DIV/0!  | 1.6333   | #DIV/0!  | #DIV/0!  | #DIV/0!  | 0.175362 |
| <i>Gstp2</i>      | 0.684582 | 0.715137 | 1.131124 | 0.524766 | 0.460327 | 0.682208 | 0.42998  | 0.052326 |
| <i>Odc1</i>       | 0.761913 | 0.197999 | 0.661105 | 0.395603 | 0.764663 | 0.210833 | 0.270878 | 0.264321 |
| <i>vim</i>        | 0.526589 | 0.546008 | 1.029442 | 0.813654 | 0.301253 | 0.69248  | 0.202045 | 0.390027 |
| <i>Pgam2</i>      | 0.745157 | #DIV/0!  | 0.52542  | 0.571972 | 0.724731 | #DIV/0!  | 0.199727 | 0.450376 |
| <i>Prdx3</i>      | 0.707955 | 0.510262 | 0.570867 | 0.631552 | 0.711886 | 0.340529 | 0.209557 | 0.410073 |
| <i>SLC25A6</i>    | 0.849638 | 0.33886  | 0.569395 | 0.127441 | 0.756168 | 0.471736 | 0.506848 | 0.142149 |
| <i>PGK1, ph</i>   | 0.315819 | 0.348646 | 0.519183 | 0.459047 | 0.305738 | 0.214597 | 0.132116 | 0.490399 |
| <i>SERPINE1</i>   | #DIV/0!  | 0.736741 | 0.875154 | 0.467543 | 0.32356  | 0.717148 | 0.351304 | 0.436992 |
| <i>DNAJA2</i>     | 0.785478 | 0.459606 | 0.585967 | 0.12774  | 0.769329 | 0.309088 | 0.093677 | 0.23062  |
| <i>Egf</i>        | 0.277847 | #DIV/0!  | 0.647063 | 0.207735 | 0.250868 | 0.112527 | 0.653399 | 0.4454   |
| <i>Tubb5</i>      | 0.893185 | 0.643913 | 0.812062 | 0.378862 | 0.185564 | 0.527179 | 0.29786  | 0.982968 |
| <i>ldh3B</i>      | 0.720769 | 0.280871 | 0.726824 | 0.438429 | 0.662956 | 0.294491 | 0.173518 | 0.502717 |
| <i>Hspa1a</i>     | 0.723419 | 1.024804 | 0.336996 | 0.830053 | 0.751115 | 0.301904 | 0.610576 | 0.803824 |
| <i>GADD153</i>    | 0.640223 | 0.731784 | 0.695501 | 0.585305 | 0.605573 | 0.719097 | 0.566811 | 0.452504 |
| <i>Hsd3b4</i>     | 0.221324 | #DIV/0!  | #DIV/0!  | 0.247402 | 0.257216 | 0.120208 | #DIV/0!  | 0.398317 |
| <i>HSPCB</i>      | 0.887158 | 0.71444  | 0.34261  | 0.617396 | 0.781967 | 0.367494 | 0.272342 | 0.744612 |
| <i>TIMP3</i>      | 0.668982 | 0.740342 | 0.556382 | 0.221612 | 0.656955 | 0.698629 | 0.252931 | 0.321676 |
| <i>Cyp1a1</i>     | #DIV/0!  | #DIV/0!  | #DIV/0!  | 0.387945 | #DIV/0!  | #DIV/0!  | #DIV/0!  | #DIV/0!  |
| <i>SAA3</i>       | 0.101823 | 0.87548  | 0.758595 | 0.221324 | 0.415093 | 0.856595 | #DIV/0!  | #DIV/0!  |
| <i>CYP7A1</i>     | #DIV/0!  | 0.764063 | #DIV/0!  | #DIV/0!  | #DIV/0!  | 0.835371 | #DIV/0!  | #DIV/0!  |
| <i>Ccng1</i>      | 0.40499  | 0.488596 | 0.211711 | 0.560409 | 0.413122 | 0.391033 | 0.173727 | 0.61854  |
| <i>Alox12b</i>    | 0.43768  | #DIV/0!  | #DIV/0!  | #DIV/0!  | 0.407765 | #DIV/0!  | #DIV/0!  | #DIV/0!  |
| <i>Akr1b8</i>     | #DIV/0!  | 0.388174 | 0.2725   | #DIV/0!  | #DIV/0!  | 0.780453 | 0.167106 | 0.720541 |
| <i>c-Fos</i>      | 0.816205 | 0.910215 | 0.745112 | #DIV/0!  | 0.702994 | 0.492748 | 0.679759 | 0.438348 |
| <i>Hoxa2</i>      | #DIV/0!  | 0.282136 | 0.853478 | 0.605619 | #DIV/0!  | #DIV/0!  | 0.91555  | 0.610039 |
| <i>Spp1</i>       | 0.475888 | 0.728489 | 0.420945 | 0.534024 | 0.689459 | 0.503023 | 0.028284 | 0.443471 |
| <i>Fga</i>        | 0.725492 | 0.665095 | 0.643467 | 0.454047 | 0.343654 | 0.616138 | #DIV/0!  | 0.713095 |
| <i>UBC</i>        | 0.360868 | 0.619343 | 0.322075 | 0.416279 | 0.463395 | 0.507502 | 0.295371 | 0.583194 |
| <i>Nqo1</i>       | 0.636116 | 0.820588 | 0.45071  | 0.168335 | 0.646778 | 0.719253 | 0.2829   | 0.324996 |
| <i>Aadat</i>      | 0.423557 | 0.617515 | #DIV/0!  | 0.268609 | 0.551543 | 0.385698 | #DIV/0!  | 0.26587  |
| <i>Kap</i>        | #DIV/0!  | 0.307591 | #DIV/0!  | 0.140113 | 0.364737 | 0.307591 | #DIV/0!  | 0.612518 |
| <i>Oat</i>        | 0.372179 | 0.303501 | 0.822107 | 0.395811 | 0.747171 | 0.391768 | 0.281895 | 0.362579 |
| <i>Hsd17b4</i>    | 0.646387 | 0.406652 | 0.312258 | 0.831488 | 0.646888 | 0.354818 | 0.299552 | 0.430771 |
| <i>RPLP0, ril</i> | 0.568126 | 0.745998 | 0.395426 | 0.065054 | 0.705855 | 0.887893 | 0.391202 | 0.402128 |
| <i>FAS</i>        | 0.483106 | 0.349841 | 0.522855 | 0.489908 | 0.326335 | 0.628272 | 0.353915 | 0.611033 |
| <i>Ndufa5</i>     | 0.485859 | 0.281765 | 0.131549 | 0.246182 | 0.366219 | 0.174408 | 0.137245 | 0.181019 |
| <i>SOD1</i>       | 0.367166 | 0.442872 | 0.348219 | 0.356354 | 0.112001 | 0.18155  | 0.353289 | 0.295946 |
| <i>SERPINCI</i>   | 0.523259 | 0.243552 | #DIV/0!  | 0.393418 | 0.730122 | 0.29486  | #DIV/0!  | 0.847814 |
|                   | #DIV/0!  |
|                   | #DIV/0!  |
| <i>Ephx1</i>      | 0.766063 | 0.551667 | 0.791697 | 0.163645 | 0.599449 | 0.43452  | 0.245233 | 0.343052 |
| <i>Ftl1</i>       | 0.571997 | 0.458211 | 0.860842 | 0.230071 | 0.573866 | 0.199029 | 0.319872 | 0.116543 |
| <i>Anxa2</i>      | 0.551223 | 0.555888 | 0.196297 | 0.34174  | 0.514283 | 0.637788 | 0.217417 | 0.394091 |
| <i>Rbp4</i>       | 0.781812 | 0.289386 | 0.763276 | 0.868691 | 0.584943 | 0.358568 | 0.872517 | 0.728412 |

|              |          |          |          |          |          |          |          |          |
|--------------|----------|----------|----------|----------|----------|----------|----------|----------|
|              | #DIV/0!  |
|              | #DIV/0!  |
|              | #DIV/0!  |
|              | #DIV/0!  |
| <b>HINT1</b> | 0.753955 | 0.550828 | 0.38126  | 0.370582 | 0.121499 | 0.309288 | 0.434196 | 0.420049 |
| <b>OAZI</b>  | 0.739689 | 0.693621 | 0.684323 | 0.61673  | 0.189466 | 0.418376 | 0.503062 | 0.604555 |
| <b>FABP4</b> | 0.492419 | 0.394226 | 0.935961 | 0.237862 | 0.06481  | 0.673201 | 0.133809 | 0.610682 |
| <b>TIMP2</b> | 0.263606 | 0.866044 | 0.724242 | 0.282652 | 0.614425 | 0.729902 | 0.371877 | 0.241274 |
|              | #DIV/0!  |          |          |          |          |          |          |          |
|              | #DIV/0!  |          |          |          |          |          |          |          |

| Rot B    | Rot L    | Rot H    | Rot K    | Anilin B | Anilin L | Anilin H | Anilin K | ID9637 B |
|----------|----------|----------|----------|----------|----------|----------|----------|----------|
| 0.497712 | 0.148773 | #DIV/0!  | #DIV/0!  | 0.794416 | 0.214746 | 0.860434 | #DIV/0!  | 0.674275 |
| 0.350018 | 0.302219 | 0.191906 | 0.284592 | 0.710847 | 0.51502  | 0.521163 | 0.536343 | 0.781308 |
| #DIV/0!  |
| 0.826204 | 0.371499 | #DIV/0!  | 0.35499  | 0.836527 | 0.291539 | 0.85616  | 0.654144 | 0.827343 |
| 0.287736 | 0.275359 | 0.183443 | 0.437961 | 0.654582 | 0.327168 | 0.422986 | 2.170664 | 0.730054 |
| 0.103575 | 0.518805 | 0.18404  | 0.303329 | 0.888744 | 0.644249 | 0.352797 | 0.228229 | 0.658117 |
| 0.354508 | 0.176521 | 0.157584 | 0.503001 | 0.639613 | 0.299167 | 0.510279 | 0.307129 | 0.677114 |
| #DIV/0!  |
| 0.334175 | 0.135193 | 0.214137 | 0.541727 | 0.604539 | 0.151361 | 0.330767 | 0.486552 | 0.783094 |
| #DIV/0!  | #DIV/0!  | #DIV/0!  | 0.285089 | #DIV/0!  | #DIV/0!  | #DIV/0!  | 0.92631  | #DIV/0!  |
| #DIV/0!  | 0.47058  | #DIV/0!  | 0.405172 | 1.6555   | 0.897791 | 0.421453 | #DIV/0!  | 0.258094 |
| 0.480581 | 0.210271 | 0.210071 | 0.476896 | 0.677349 | 0.160106 | 0.36342  | 0.240901 | 0.772991 |
| 0.733069 | 0.565399 | 0.262289 | 0.409558 | 0.448994 | 0.59501  | 0.316278 | 0.874712 | 0.3703   |
| 0.652736 | #DIV/0!  | #DIV/0!  | 0.475538 | 0.93921  | #DIV/0!  | 0.237868 | 0.877894 | 0.815509 |
| 0.628666 | 0.332992 | 0.168459 | 0.57721  | 0.748948 | 0.40531  | 0.237875 | 0.309163 | 0.729444 |
| 0.713261 | 0.308696 | 0.226566 | 0.699059 | 0.887419 | 0.612994 | 0.425901 | 0.380913 | #DIV/0!  |
| 0.304038 | 0.255343 | 0.131074 | 0.429571 | 0.609047 | 0.270121 | 0.259572 | 0.452965 | 0.318535 |
| 0.956008 | 0.762904 | 0.234001 | 0.381474 | 0.535538 | 0.926435 | 0.408107 | 0.829109 | #DIV/0!  |
| 0.35535  | 0.425437 | 0.216657 | 0.291531 | 0.648274 | 0.417605 | 0.182823 | 0.199067 | 0.814019 |
| 0.269408 | #DIV/0!  | #DIV/0!  | 0.200696 | #DIV/0!  | 0.006364 | 0.693713 | 0.467088 | 0.269408 |
| 0.270062 | 0.512334 | 0.264139 | 0.379481 | 0.153185 | 0.734279 | 0.690317 | 0.391415 | 0.60243  |
| 0.299355 | 0.23392  | 0.194389 | 0.42905  | 0.740997 | 0.218915 | 0.442493 | 0.47046  | 0.660764 |
| 0.416992 | 0.967731 | 0.26892  | 0.827924 | 0.715531 | 0.795726 | 0.357956 | 1.168002 | 0.774988 |
| 0.338599 | 0.771602 | 0.141888 | 0.661101 | 0.803807 | 0.794322 | 0.464897 | 0.719998 | 0.673989 |
| 0.893428 | 0.924423 | #DIV/0!  | 0.295236 | 0.352908 | 0.398101 | 0.445501 | 0.563946 | 0.206475 |
| 0.526489 | 0.462604 | 0.188172 | 0.663165 | 0.936511 | 0.581739 | 0.300836 | 0.641207 | 0.793615 |
| 0.605343 | 0.643607 | 0.200861 | 0.313095 | 0.742757 | 0.704635 | 0.110681 | 0.367859 | 0.692388 |
| #DIV/0!  |
| #DIV/0!  | 0.999109 | #DIV/0!  | #DIV/0!  | 0.408096 | 0.86578  | 0.135057 | 0.937624 | 0.881645 |
| #DIV/0!  | 0.881916 | #DIV/0!  | #DIV/0!  | #DIV/0!  | 0.831903 | #DIV/0!  | #DIV/0!  | #DIV/0!  |
| 0.384414 | 0.470951 | 0.146678 | 0.539509 | 0.391346 | 0.453382 | 0.323836 | 0.563126 | 0.476678 |
| 0.837279 | #DIV/0!  | #DIV/0!  | #DIV/0!  | 0.754207 | #DIV/0!  | #DIV/0!  | #DIV/0!  | 0.91609  |
| #DIV/0!  | 0.364311 | #DIV/0!  | #DIV/0!  | 0.729941 | 0.348239 | 0.566596 | 0.730198 | #DIV/0!  |
| 0.97597  | 1.06801  | #DIV/0!  | 0.515407 | 0.805394 | 0.922665 | 0.591199 | 0.041719 | 0.76146  |
| #DIV/0!  | #DIV/0!  | #DIV/0!  | 0.794422 | #DIV/0!  | #DIV/0!  | 0.849854 | #DIV/0!  | #DIV/0!  |
| 0.757606 | 0.727149 | 0.231005 | 0.43305  | 0.724967 | 0.809177 | 0.028284 | 0.586861 | 0.885992 |
| 0.793397 | 0.42968  | #DIV/0!  | 0.569382 | 0.792169 | 0.448153 | 0.643467 | 1.245044 | 0.982196 |
| 0.973587 | 0.312627 | 0.212864 | 0.518573 | 0.504102 | 0.498838 | 0.367329 | 0.403089 | 0.365159 |
| 0.515826 | 0.717016 | 0.225707 | 0.429393 | 0.93466  | 0.88873  | 0.567272 | 0.427865 | 0.573338 |
| 0.577786 | 0.219875 | #DIV/0!  | 0.272011 | 0.989816 | 0.381144 | #DIV/0!  | 0.772466 | 0.372645 |
| 1.133157 | #DIV/0!  | #DIV/0!  | 0.284469 | 0.019092 | 0.54256  | #DIV/0!  | 0.257108 | #DIV/0!  |
| 0.377296 | 0.458454 | 0.192    | 0.27912  | 0.783564 | 0.464353 | 0.259038 | 0.200183 | 0.756004 |
| 0.586867 | 0.364908 | 0.180075 | 0.498216 | 0.854171 | 0.606564 | 0.322088 | 0.39822  | 0.927284 |
| 0.712057 | 0.719356 | 0.259168 | 0.277186 | 1.919826 | 0.697779 | 0.512629 | 0.941809 | 0.867424 |
| 0.705198 | 0.395396 | 0.139183 | 0.278945 | 0.175948 | 0.943012 | 0.705807 | 0.58132  | 0.684867 |
| #DIV/0!  | 0.142619 | #DIV/0!  | 0.618928 | 0.420021 | 0.170872 | 0.863745 | 0.798986 | 1.417042 |
| 0.407893 | 0.217382 | 0.109877 | 0.471824 | 0.794977 | 0.257969 | 0.648971 | 0.570143 | 0.784321 |
| 0.202233 | 0.271564 | #DIV/0!  | 0.74776  | 0.533995 | 0.249071 | 0.435578 | 0.781193 | 1.191262 |
| #DIV/0!  |
| #DIV/0!  |
| 0.617521 | 0.425661 | 0.197492 | 0.230121 | 0.894251 | 0.530575 | 0.237587 | 0.413808 | 0.769257 |
| 0.331228 | 0.117704 | 0.242208 | 0.369908 | 0.671863 | 0.332395 | 0.075256 | 0.32743  | 0.613609 |
| 0.630911 | 0.521226 | 0.166409 | 0.415343 | 0.832758 | 0.534907 | 0.598392 | 0.612159 | 0.514847 |
| 0.713346 | 0.327889 | 0.231901 | 0.725263 | 0.665826 | 0.396497 | 0.756703 | 1.219122 | 0.877931 |

|          |          |          |          |          |          |          |          |          |
|----------|----------|----------|----------|----------|----------|----------|----------|----------|
| #DIV/0!  |
| #DIV/0!  |
| #DIV/0!  |
| #DIV/0!  |
| 0.300859 | 0.166946 | 0.133478 | 0.542068 | 1.071509 | 0.107273 | 0.478647 | 0.541757 | 0.813231 |
| 0.150443 | 0.357094 | 0.203986 | 0.666126 | 0.819422 | 0.207101 | 0.242469 | 0.600374 | 0.67764  |
| 0.462448 | 0.432216 | 0.27557  | 0.367867 | #DIV/0!  | 0.726728 | 0.332408 | 0.528629 | 0.707814 |
| 0.664616 | 0.65846  | 0.219537 | 0.331883 | 0.895163 | 0.800173 | 0.248446 | 0.285264 | 0.694855 |

| ID9637 L | ID9637 H | ID9637 K | DHC B    | DHC L    | DHC H    | DHC K    | DAToI B  | DAToI L  |
|----------|----------|----------|----------|----------|----------|----------|----------|----------|
| 0.263089 | 0.066114 | 0.519878 | 0.80609  | 0.368415 | 0.06082  | 0.507165 | 0.810344 | 0.282118 |
| 0.339811 | 0.504908 | 0.184717 | 0.43588  | 0.26361  | 0.50496  | 0.519981 | 0.393996 | 0.399951 |
| #DIV/0!  |
| 0.455224 | 0.165463 | 0.481238 | 0.83807  | 0.342688 | 0.935872 | 0.868699 | 0.738514 | 0.48832  |
| 0.257276 | 0.316404 | 0.341781 | 0.648284 | 0.220357 | 0.596421 | 0.581902 | 0.297979 | 0.709827 |
| 0.458062 | 0.386689 | 0.231512 | 0.695379 | 0.463851 | 0.652845 | 0.46229  | 0.225482 | 0.690513 |
| 0.219715 | 0.451394 | 0.202189 | 0.799853 | 0.145335 | 0.638843 | 0.427329 | 0.273546 | 0.143133 |
| #DIV/0!  |
| 0.495549 | 0.590224 | 0.717393 | 0.733679 | 0.382102 | 0.474174 | 0.742576 | 0.347386 | 0.726604 |
| #DIV/0!  | #DIV/0!  | #DIV/0!  | #DIV/0!  | #DIV/0!  | #DIV/0!  | 0.715134 | #DIV/0!  | #DIV/0!  |
| 0.506757 | 0.516011 | #DIV/0!  | #DIV/0!  | 0.493213 | 0.392535 | 0.481099 | #DIV/0!  | 0.469579 |
| 0.361925 | 0.318413 | 0.393983 | 0.781662 | 0.207808 | 0.723729 | 0.467153 | 0.56762  | 0.193384 |
| 0.635314 | 0.42428  | 0.778229 | 0.326309 | 0.551218 | 0.662606 | 1.116953 | 0.363035 | 0.793757 |
| #DIV/0!  | 0.369483 | 0.555013 | 0.716201 | #DIV/0!  | 0.635986 | 0.615792 | 0.893698 | #DIV/0!  |
| 0.353413 | 0.244839 | 0.30036  | 0.767489 | 0.358289 | 0.640905 | 0.643569 | 0.779916 | 0.453246 |
| 0.263546 | 0.414386 | 0.39503  | 0.845376 | 0.489125 | 0.976617 | 0.763777 | 0.695288 | 0.840212 |
| 0.203351 | 0.540959 | 0.479885 | 0.377283 | 0.281423 | 0.791761 | 0.733633 | 0.398515 | 0.654851 |
| 0.81867  | 0.783937 | 0.940243 | 0.836507 | 0.881601 | 0.544177 | 1.174258 | 0.363016 | 0.731687 |
| 0.31033  | 0.257167 | 0.252184 | 0.467177 | 0.328933 | 0.55416  | 0.606737 | 0.369761 | 0.869308 |
| 0.458205 | 0.738996 | 0.234646 | 0.872906 | 0.631975 | 0.72289  | 0.838806 | #DIV/0!  | 0.159806 |
| 0.531777 | 0.345746 | 0.590351 | 0.21146  | 0.450977 | 0.749014 | 0.961323 | 0.369116 | 0.626355 |
| 0.216557 | 0.16742  | 0.416729 | 0.424285 | 0.188717 | 0.51492  | 0.62523  | 0.388977 | 0.526912 |
| 0.432472 | 0.148492 | 0.910423 | 0.78349  | 0.769596 | 0.359917 | 0.893368 | 0.598125 | 0.562645 |
| 0.757641 | 0.54174  | 0.482175 | 0.745494 | 0.783468 | 0.680788 | 0.479588 | 0.733399 | 0.778521 |
| 0.070004 | #DIV/0!  | 0.452298 | 0.233345 | 0.884096 | #DIV/0!  | 0.41606  | 0.509632 | 0.901584 |
| 0.385684 | 0.398446 | 0.619613 | 0.811053 | 0.402329 | 0.524102 | 0.970602 | 0.587816 | 0.43689  |
| 0.677025 | 0.244839 | 0.266249 | 0.701362 | 0.836538 | 0.823384 | 0.711303 | 0.311415 | 0.791286 |
| #DIV/0!  | #DIV/0!  | #DIV/0!  | #DIV/0!  | #DIV/0!  | #DIV/0!  | 0.115258 | #DIV/0!  | #DIV/0!  |
| 0.757232 | 0.469248 | 0.780646 | #DIV/0!  | 0.645747 | 0.295571 | #DIV/0!  | 0.732563 | 0.440986 |
| 0.608852 | #DIV/0!  | #DIV/0!  | #DIV/0!  | 0.779582 | #DIV/0!  | #DIV/0!  | #DIV/0!  | 1.15832  |
| 0.565893 | 0.132997 | 0.599148 | 0.399082 | 0.424733 | 0.370159 | 0.726496 | 0.314432 | 0.582066 |
| #DIV/0!  | #DIV/0!  | #DIV/0!  | 0.562764 | #DIV/0!  | #DIV/0!  | #DIV/0!  | 0.666076 | #DIV/0!  |
| 0.573309 | 0.167106 | 0.696351 | #DIV/0!  | 0.226981 | 0.523504 | 0.707814 | #DIV/0!  | 0.667408 |
| 0.986649 | 0.622586 | 0.390743 | 0.858063 | 0.812141 | 0.672097 | 0.64506  | 0.755779 | 0.915968 |
| #DIV/0!  | 0.891198 | 0.663783 | #DIV/0!  | #DIV/0!  | 0.76604  | 0.633899 | #DIV/0!  | #DIV/0!  |
| 0.917971 | 0.028284 | 0.394393 | 0.81416  | 0.746364 | 1.91659  | 0.412408 | 0.691823 | 0.784221 |
| 0.383107 | 0.785328 | 0.790268 | 2.673469 | 0.433545 | 0.643467 | 0.675841 | 0.725492 | 0.452023 |
| 0.405655 | 0.546155 | 0.474388 | 1.085207 | 0.391012 | 0.443937 | 0.436686 | 0.054556 | 0.657568 |
| 0.711559 | 0.498442 | 0.330037 | 0.805968 | 0.79058  | 0.504105 | 0.694669 | 0.60362  | 0.73434  |
| 0.250906 | #DIV/0!  | 0.224336 | 0.258801 | 0.286225 | #DIV/0!  | 0.497484 | 0.483615 | 0.371044 |
| 0.547301 | #DIV/0!  | 0.223261 | 0.269408 | #DIV/0!  | #DIV/0!  | 0.482062 | #DIV/0!  | 0.307591 |
| 0.840722 | 0.295647 | 0.114199 | 0.563166 | 0.400939 | 0.646335 | 0.444328 | 0.360109 | 0.28861  |
| 0.475359 | 0.408853 | 0.387742 | 0.956721 | 0.400841 | 0.825353 | 0.666288 | 0.731175 | 0.718669 |
| 0.662559 | 0.81469  | 0.940363 | 0.707073 | 0.915855 | 0.479658 | #DIV/0!  | 0.621405 | 0.548423 |
| 0.5603   | 0.422406 | 0.48164  | 0.839128 | 0.462801 | 0.499145 | 0.417116 | 0.144931 | 0.558643 |
| 0.209604 | 0.165505 | 0.781963 | 0.482818 | 0.140209 | 0.562657 | 0.159751 | 0.676892 | 0.199292 |
| 0.199719 | 0.365191 | 0.269311 | 0.496799 | 0.240047 | 0.400809 | 0.575036 | 0.385034 | 0.226354 |
| 0.311978 | #DIV/0!  | 0.025658 | 0.419935 | 0.247886 | #DIV/0!  | 0.479418 | 0.523259 | 0.345937 |
| #DIV/0!  |
| #DIV/0!  |
| 0.824188 | 0.22555  | 0.28452  | 0.604571 | 0.417549 | 0.578781 | 0.593012 | 0.791337 | 0.562934 |
| 0.215243 | 0.419463 | 0.219458 | 0.635119 | 0.305878 | 0.598997 | 0.520612 | 0.451609 | 0.397526 |
| 0.567546 | 0.519448 | 0.561247 | 0.485898 | 0.508231 | 0.643883 | 0.614855 | 0.511603 | 0.838526 |
| 0.597111 | 0.875926 | 0.294968 | 0.510519 | 0.277577 | 0.88008  | 0.590636 | 0.443683 | 0.351284 |

|          |          |          |          |          |          |          |          |          |
|----------|----------|----------|----------|----------|----------|----------|----------|----------|
| #DIV/0!  |
| #DIV/0!  |
| #DIV/0!  |
| #DIV/0!  |
| 0.154046 | 0.238158 | 0.432825 | 0.878762 | 0.257999 | 0.491801 | 0.653679 | 0.264996 | 0.504062 |
| 0.195337 | 0.445665 | 0.60732  | 0.743223 | 0.371148 | 0.791654 | 0.898235 | 0.110856 | 0.326984 |
| 0.390824 | 0.143414 | 0.433293 | #DIV/0!  | 0.507185 | 0.422327 | 0.314249 | 0.777091 | 0.439265 |
| 0.683833 | 0.367542 | 0.22246  | 0.629732 | 0.781391 | 0.921097 | 0.720821 | 0.767177 | 0.671562 |

| DATAI H  | DATAI K  |
|----------|----------|
| 0.317792 | 0.754997 |
| 0.409556 | 0.315562 |
| #DIV/0!  | #DIV/0!  |
| 0.764164 | 0.482719 |
| 0.356319 | 0.346775 |
| 0.292311 | 0.317173 |
| 0.318934 | 0.254866 |
| #DIV/0!  | #DIV/0!  |
| 0.165266 | 0.493308 |
| #DIV/0!  | 0.310696 |
| 0.511011 | 0.91444  |
| 0.268054 | 0.5432   |
| 0.186209 | 0.838174 |
| 0.273246 | 0.488142 |
| 0.195396 | 0.366196 |
| 0.519845 | 0.397262 |
| 0.218136 | 0.44232  |
| 0.221923 | 0.911943 |
| 0.141159 | 0.372599 |
| 0.667558 | 0.36976  |
| 0.32073  | 0.950946 |
| 0.202388 | 0.477402 |
| #DIV/0!  | 0.920637 |
| 0.54236  | 0.252416 |
| 0.763366 | 0.315568 |
| 0.162211 | 0.694321 |
| 0.069586 | 0.405738 |
| #DIV/0!  | #DIV/0!  |
| 0.706379 | 0.583988 |
| #DIV/0!  | #DIV/0!  |
| 0.16619  | 0.611854 |
| #DIV/0!  | #DIV/0!  |
| 0.657539 | 0.95813  |
| 0.812216 | 0.364338 |
| 0.990082 | 0.736098 |
| 0.253932 | 0.479551 |
| 0.643467 | 0.713667 |
| 0.224069 | 0.444279 |
| 0.27716  | 0.401568 |
| #DIV/0!  | 0.296867 |
| #DIV/0!  | 0.477447 |
| 0.218902 | 0.385793 |
| 0.354275 | 0.380756 |
| 0.391202 | 0.591141 |
| 0.238638 | 0.407038 |
| 0.156417 | 0.894487 |
| 0.388578 | 0.258801 |
| #DIV/0!  | 0.709935 |
| #DIV/0!  | #DIV/0!  |
| #DIV/0!  | #DIV/0!  |
| 0.142146 | 0.398792 |
| 0.32031  | 0.249523 |
| 0.237742 | 0.357395 |
| 0.894827 | 0.415552 |

|          |          |
|----------|----------|
| #DIV/0!  | #DIV/0!  |
| 0.268087 | 0.432986 |
| 0.445738 | 0.633423 |
| 0.319288 | 0.371234 |
| 0.323355 | 0.638816 |
